# Supplementary material
Source: HighWire-hosted journal article supplement (https://cmaj.ca/highwire/filestream/75053/field_highwire_adjunct_files/1/190966-res-2-at.pdf)
Supplement: 190966-res-2-at.pdf [file 190966-res-2-at.pdf]

## Appendix 2 (as submitted by the authors): Infection codes

| Code | Description                                                                                           | Code | Description                                                                            |
|------|-------------------------------------------------------------------------------------------------------|------|----------------------------------------------------------------------------------------|
| A00  | Cholera                                                                                               | A548 | Other gonococcal infections                                                            |
| A01  | Typhoid and paratyphoid fevers                                                                        | A55  | Chlamydial lymphogranuloma (venereum)                                                  |
| A02  | Other salmonella infections                                                                           | A56  | Other sexually transmitted chlamydial diseases                                         |
| A03  | Shigellosis                                                                                           | A57  | Chancroid                                                                              |
| A04  | Other bacterial intestinal infections                                                                 | A58  | Granuloma inguinale                                                                    |
| A05  | Other bacterial foodborne intoxications, not elsewhere classified                                     | A66  | Yaws                                                                                   |
| A05  | Other bacterial foodborne intoxications                                                               | A67  | Pinta [carate]                                                                         |
| A058 | Other specified bacterial foodborne intoxications                                                     | A69  | Other spirochaetal infections                                                          |
| A15  | Respiratory tuberculosis, bacteriologically and histologically confirmed                              | A70  | Chlamydia psittaci infection                                                           |
| A150 | Tuberculosis of lung, confirmed by sputum microscopy with or without culture                          | A71  | Trachoma                                                                               |
| A152 | Tuberculosis of lung, confirmed histologically                                                        | A74  | Other diseases caused by chlamydiae                                                    |
| A153 | Tuberculosis of lung, confirmed by unspecified means                                                  | A75  | Typhus fever                                                                           |
| A159 | Respiratory tuberculosis unspecified, confirmed bacteriologically and histologically                  | A77  | Spotted fever [tick-borne rickettsioses]                                               |
| A16  | Respiratory tuberculosis, not confirmed bacteriologically or histologically                           | A78  | Q fever                                                                                |
| A161 | Tuberculosis of lung, bacteriological and histological examination not done                           | A79  | Other rickettsioses                                                                    |
| A162 | Tuberculosis of lung, without mention of bacteriological or histological confirmation                 | B37  | Candidiasis                                                                            |
| A169 | Respiratory tuberculosis unspecified, without mention of bacteriological or histological confirmation | B378 | Candidiasis of other sites                                                             |
| A17  | Tuberculosis of nervous system                                                                        | B38  | Coccidioidomycosis                                                                     |
| A18  | Tuberculosis of other organs                                                                          | B39  | Histoplasmosis                                                                         |
| A19  | Miliary tuberculosis                                                                                  | B40  | Blastomycosis                                                                          |
| A20  | Plague                                                                                                | B41  | Paracoccidioidomycosis                                                                 |
| A21  | Tularaemia                                                                                            | B42  | Sporotrichosis                                                                         |
| A22  | Anthrax                                                                                               | B43  | Chromomycosis and phaeomycotic abscess                                                 |
| A23  | Brucellosis                                                                                           | B44  | Aspergillosis                                                                          |
| A24  | Glanders and melioidosis                                                                              | B45  | Cryptococcosis                                                                         |
| A25  | Rat-bite fevers                                                                                       | B46  | Zygomycosis                                                                            |
| A26  | Erysipeloid                                                                                           | B47  | Mycetoma                                                                               |
| A27  | Leptospirosis                                                                                         | B48  | Other mycoses, not elsewhere classified                                                |
| A28  | Other zoonotic bacterial diseases, not elsewhere classified                                           | B49  | Unspecified mycosis                                                                    |
| A30  | Sepsis due to Escherichia coli                                                                        | B95  | Streptococcus and staphylococcus as the cause of diseases classified to other chapters |
| A31  | Sepsis due to Pseudomonas                                                                             | B954 | Other streptococcus as the cause of diseases classified to other chapters              |
| A32  | Sepsis due to Serratia                                                                                | B96  | Other specified bacterial agents as the cause of diseases classified to other chapters |
| A33  | Sepsis due to other Gram-negative organism                                                            | B96  | Other bacterial agents as the cause of diseases classified to other chapters           |
| A34  | Leprosy [Hansen's disease]                                                                            | B968 | Other specified bacterial agents as the cause of diseases classified to other chapters |
| A35  | Infection due to other mycobacteria                                                                   | G00  | Bacterial meningitis, not elsewhere classified                                         |
| A36  | Listeriosis                                                                                           | G01  | Meningitis in bacterial diseases classified elsewhere                                  |
| A37  | Tetanus neonatorum                                                                                    | N390 | Urinary tract infection, site not specified                                            |
| A38  | Obstetrical tetanus                                                                                   | J13  | Pneumonia due to Streptococcus pneumoniae                                              |
| A39  | Other tetanus                                                                                         | J14  | Pneumonia due to Haemophilus influenzae                                                |
| A40  | Diphtheria                                                                                            | J15  | Bacterial pneumonia, not elsewhere classified                                          |

Appendix to: Lane DJ, Wunsch H, Saskin R, et al. Screening strategies to identify sepsis in the prehospital setting: a validation study. *CMAJ* 2020. DOI:10.1503/cmaj.190966. Copyright © 2020 The Author(s) or their employer(s).

To receive this resource in an accessible format, please contact us at [cmajgroup@cmaj.ca](mailto:cmajgroup@cmaj.ca).

|      |                                                    |      |                                                                              |
|------|----------------------------------------------------|------|------------------------------------------------------------------------------|
| A40  | Whooping cough                                     | J18  | Pneumonia, organism unspecified                                              |
| A41  | Scarlet fever                                      | J440 | Chronic obstructive pulmonary disease with acute lower respiratory infection |
| A41  | Meningococcal infection                            | K35  | Acute appendicitis                                                           |
| A415 | Streptococcal sepsis                               | K36  | Other appendicitis                                                           |
| A415 | Streptococcal septicaemia                          | K37  | Unspecified appendicitis                                                     |
| A418 | Other sepsis                                       | L01  | Impetigo                                                                     |
| A418 | Other septicaemia                                  | M000 | Staphylococcal arthritis and polyarthritis                                   |
| A42  | Sepsis due to other Gram-negative organisms        | M001 | Pneumococcal arthritis and polyarthritis                                     |
| A43  | Septicaemia due to other Gram-negative organisms   | M002 | Other streptococcal arthritis and polyarthritis                              |
| A44  | Other specified sepsis                             | M008 | Arthritis and polyarthritis due to other specified bacterial agents          |
| A46  | Other specified septicaemia                        | M011 | Tuberculous arthritis                                                        |
| A48  | Actinomycosis                                      | M011 | Tuberculous arthritis (A18.0+)                                               |
| A49  | Nocardiosis                                        | M013 | Arthritis in other bacterial diseases classified elsewhere                   |
| A50  | Bartonellosis                                      | M016 | Arthritis in mycoses                                                         |
| A51  | Erysipelas                                         | M016 | Arthritis in mycoses (B35-B49+)                                              |
| A52  | Other bacterial diseases, not elsewhere classified | M018 | Arthritis in other infectious and parasitic diseases classified elsewhere    |
| A53  | Bacterial infection of unspecified site            | P36  | Bacterial sepsis of newborn                                                  |
| A54  | Gonococcal infection                               | Y40  | Systemic antibiotics                                                         |
